# Supplementary figures and images for: Long term intrinsic cycling in human life course antibody responses to influenza A(H3N2): an observational and modeling study
Source: eLife journal article supplement (doi:10.7554/elife.81457), 2022-12-02

**A**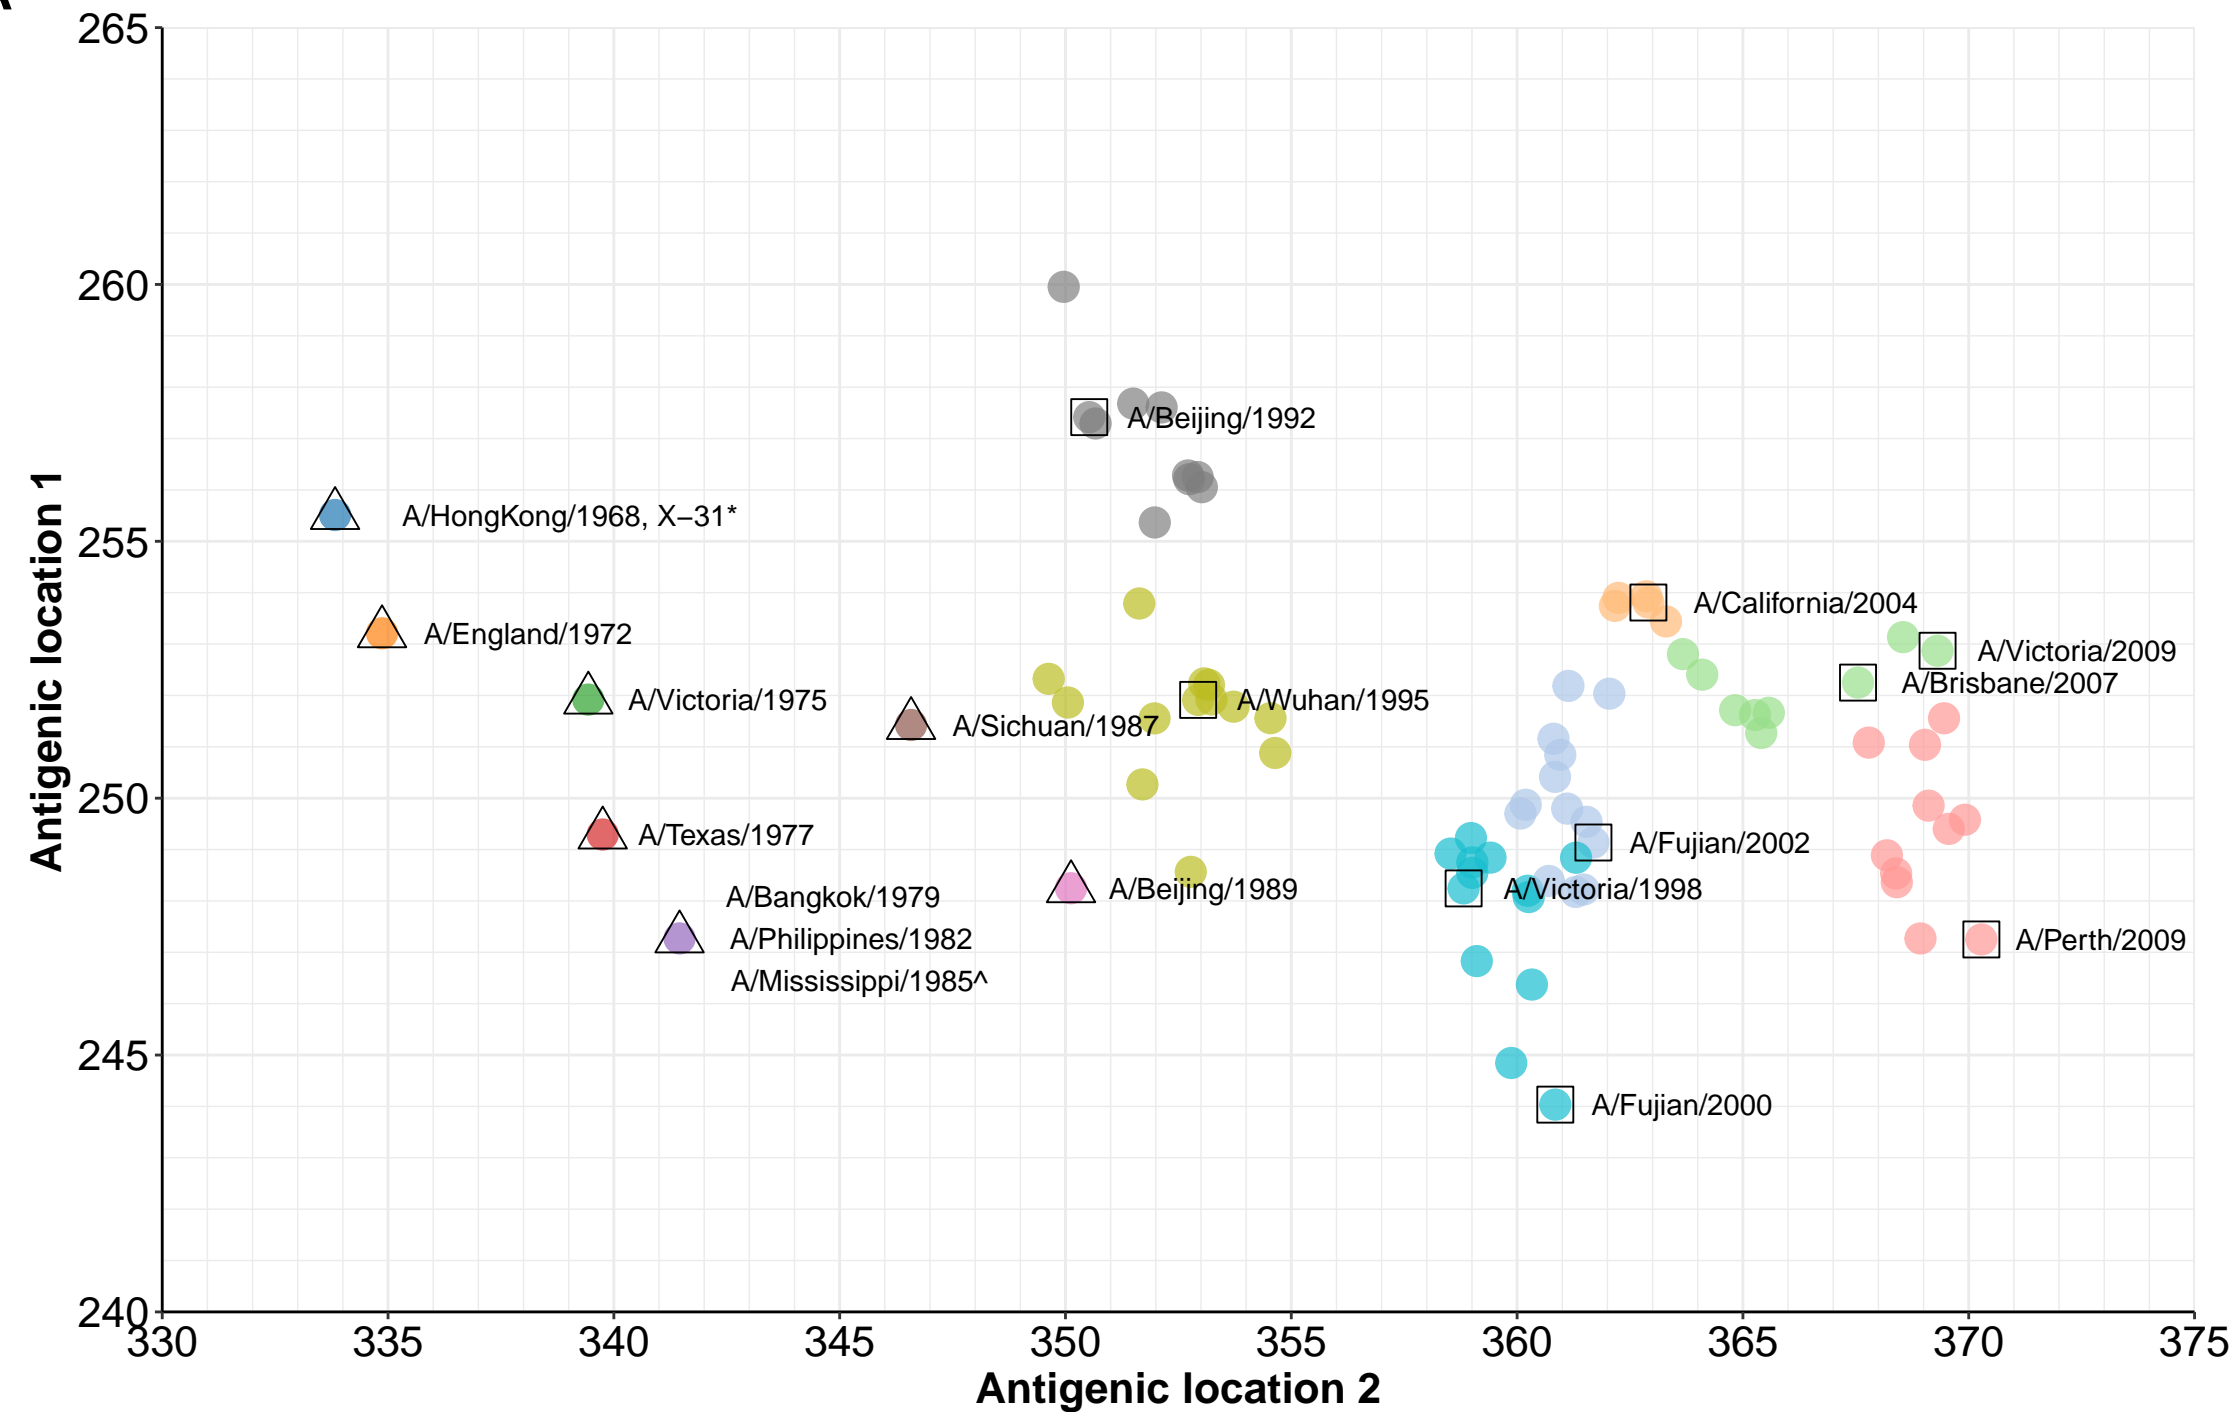**B**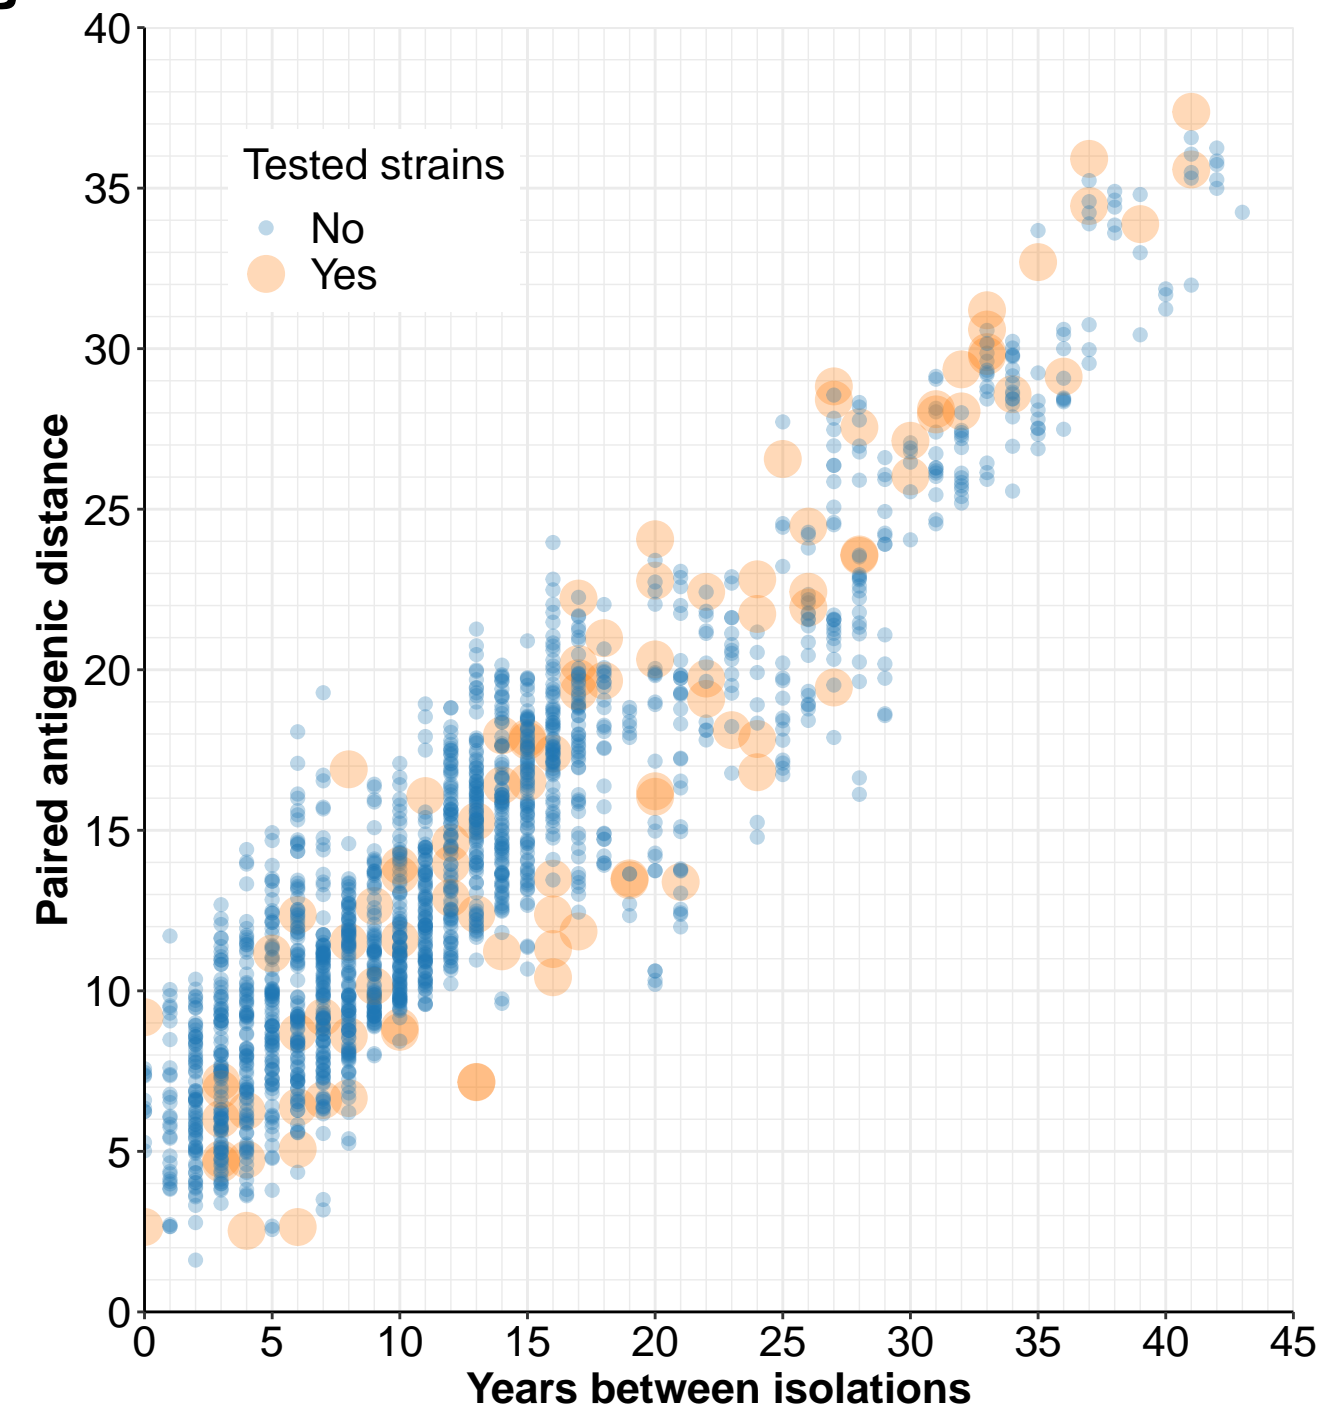

Supplement: supp [file elife-81457-supp-v1.zip]

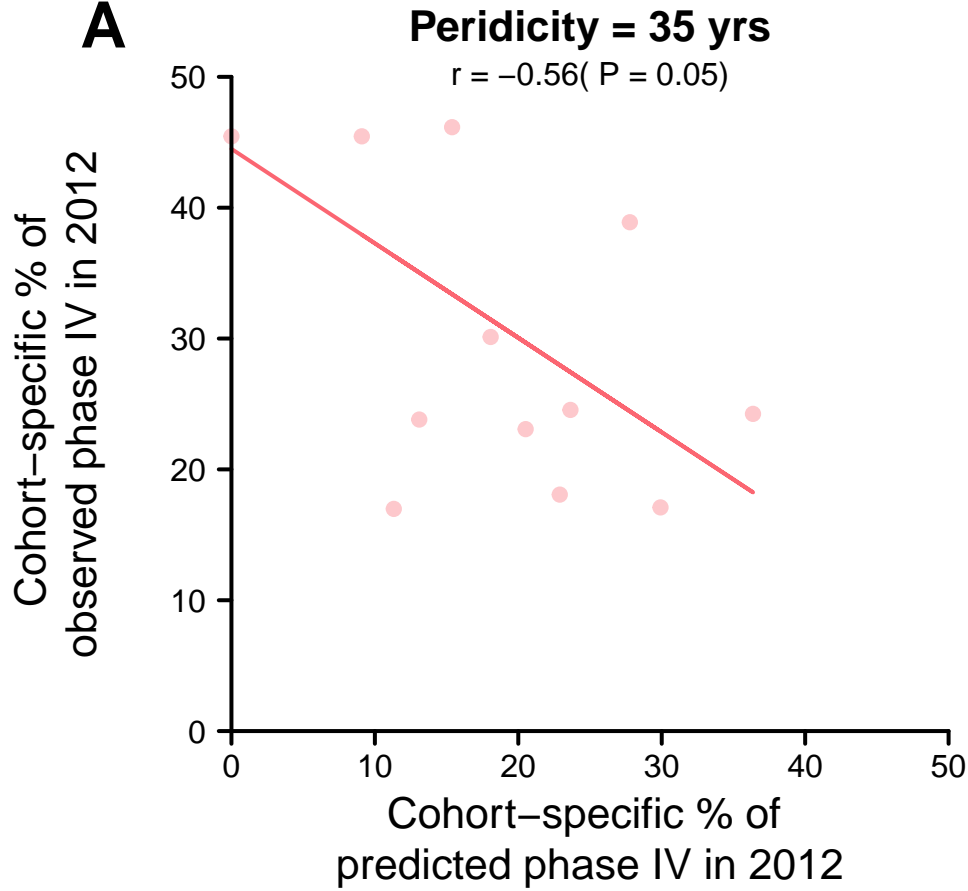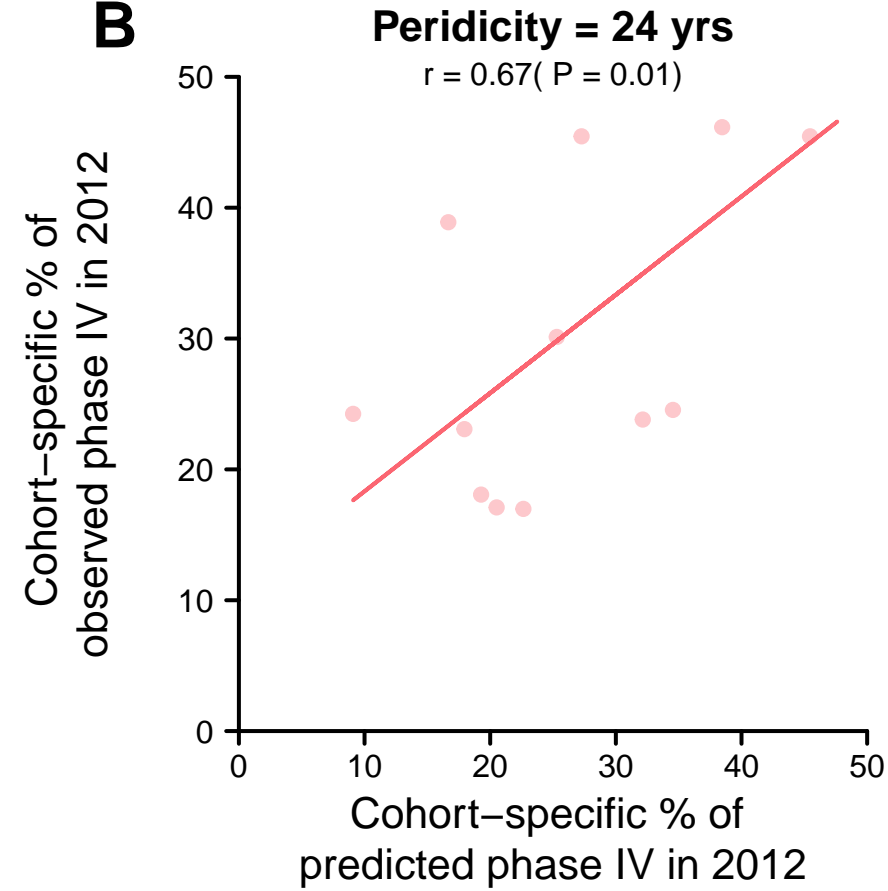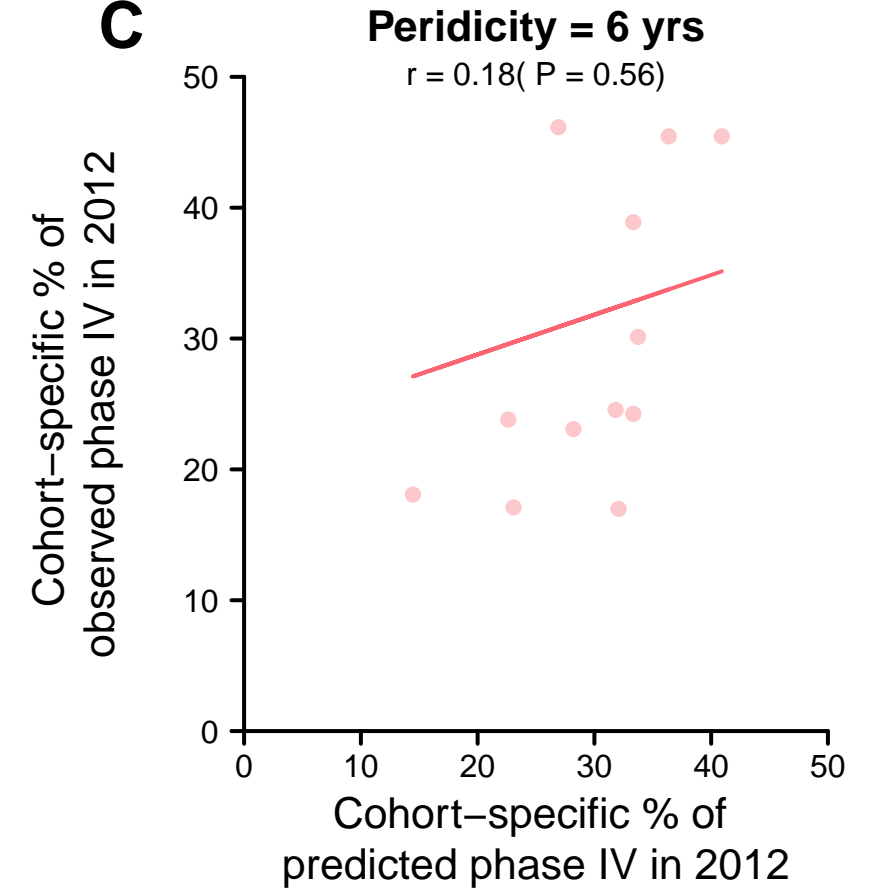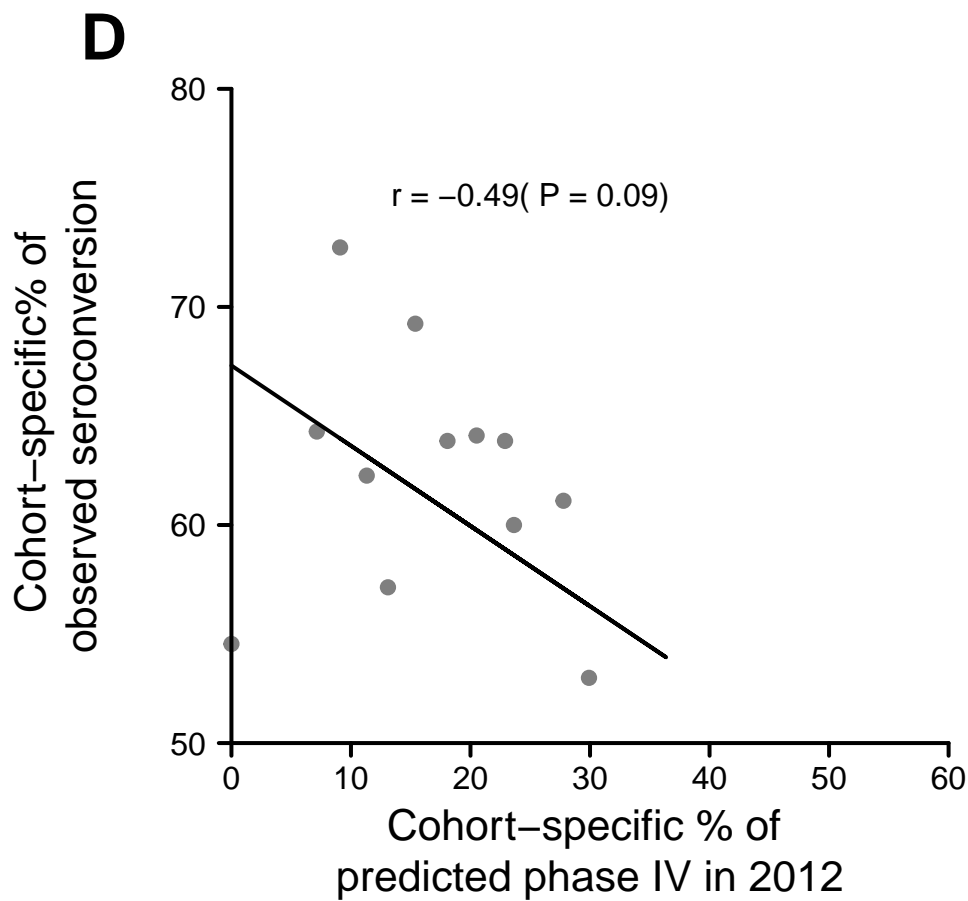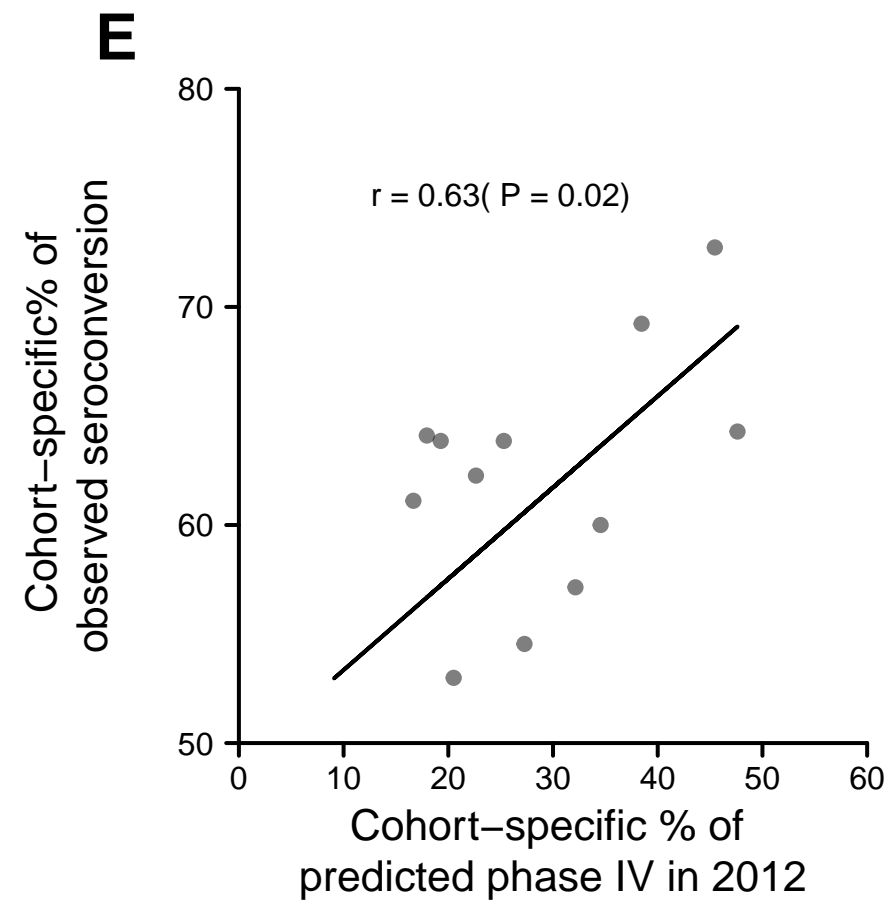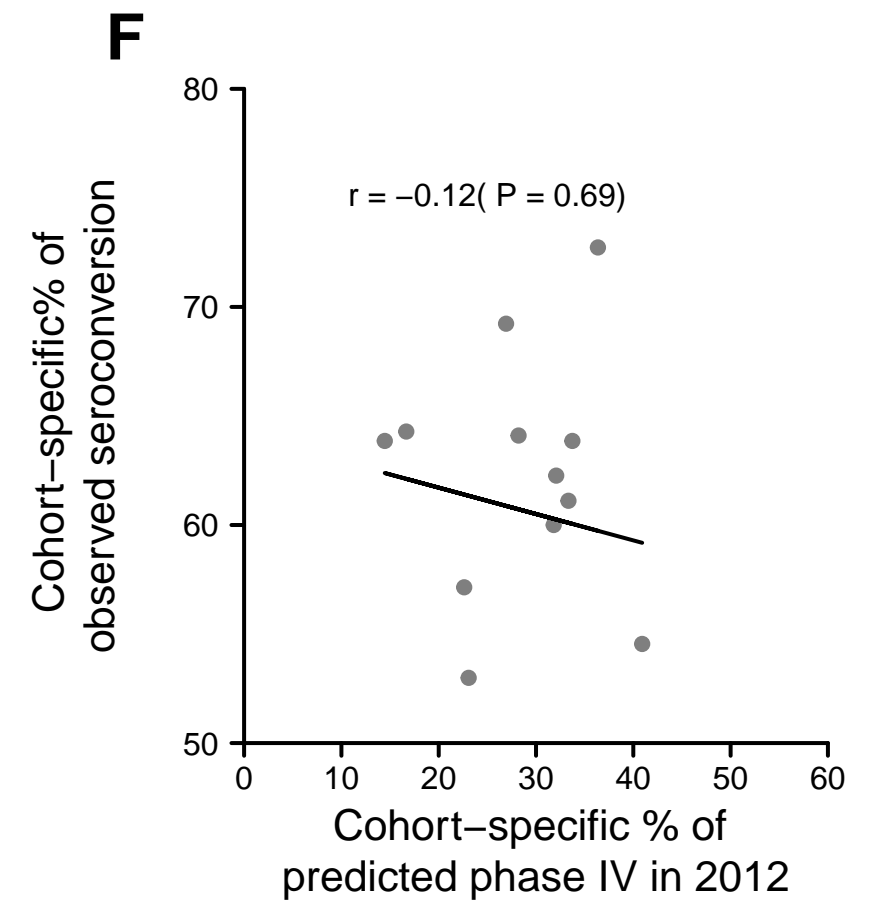

Supplement: supp [file elife-81457-supp-v1.zip]

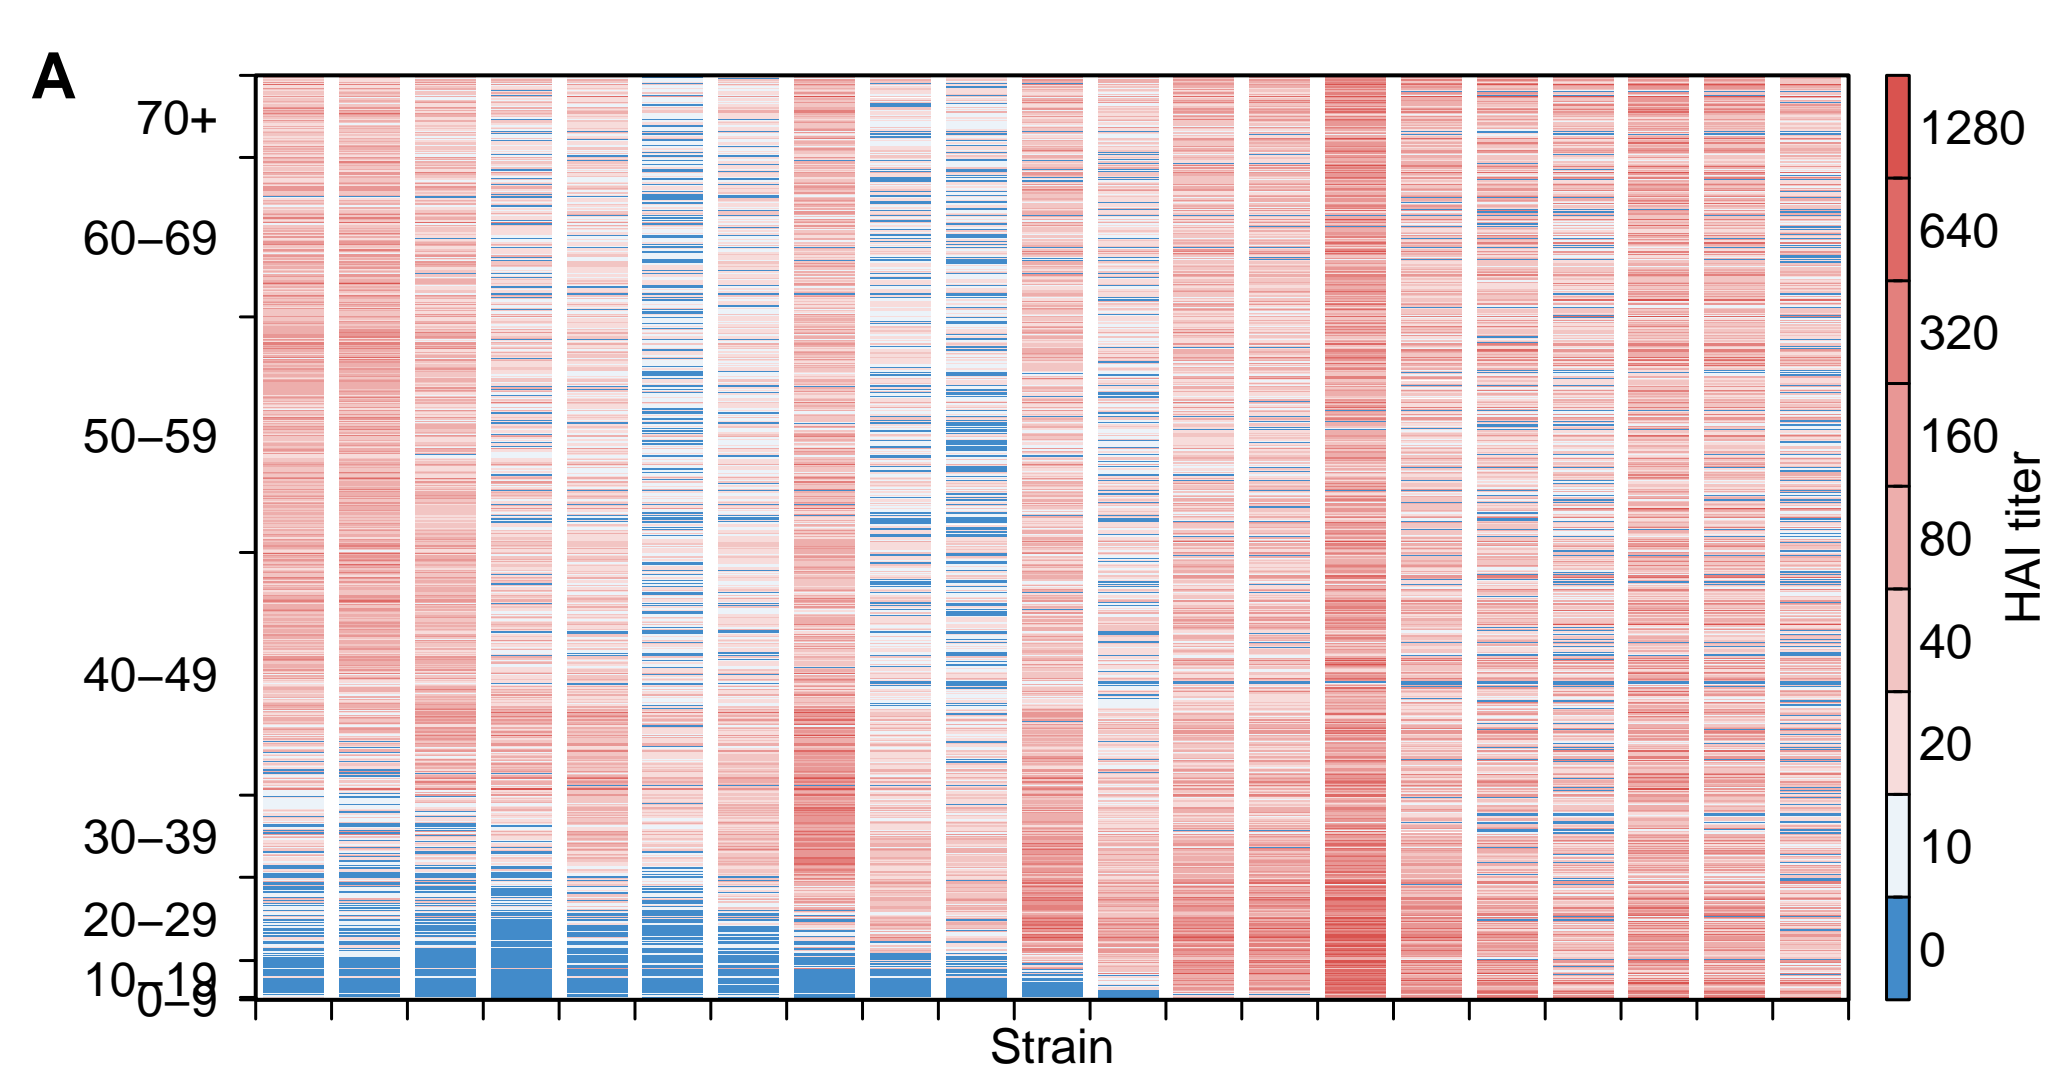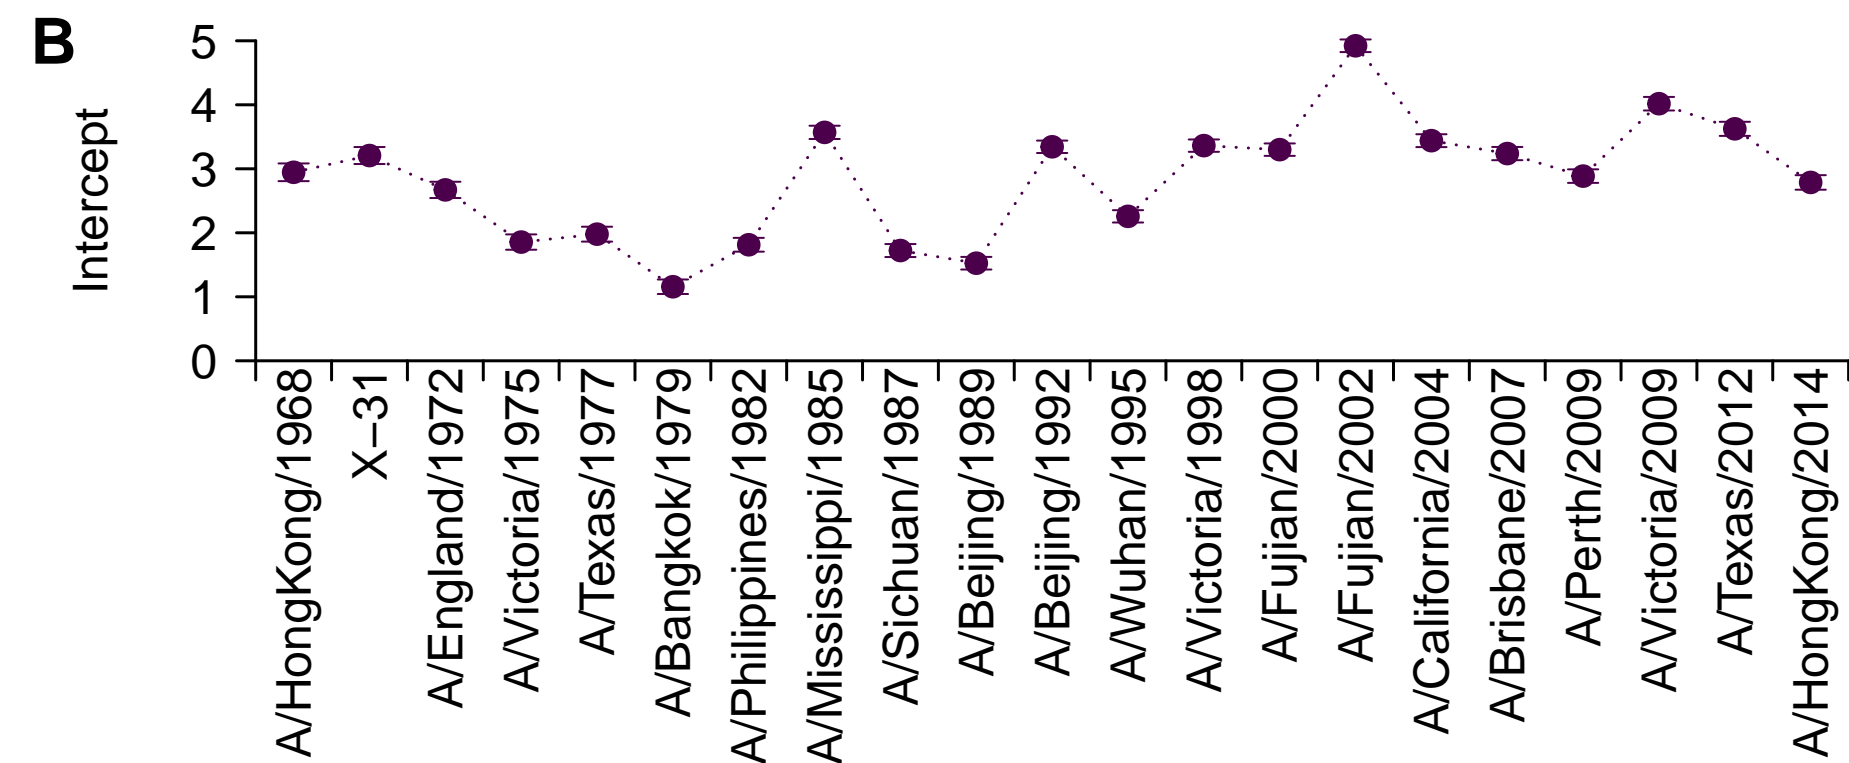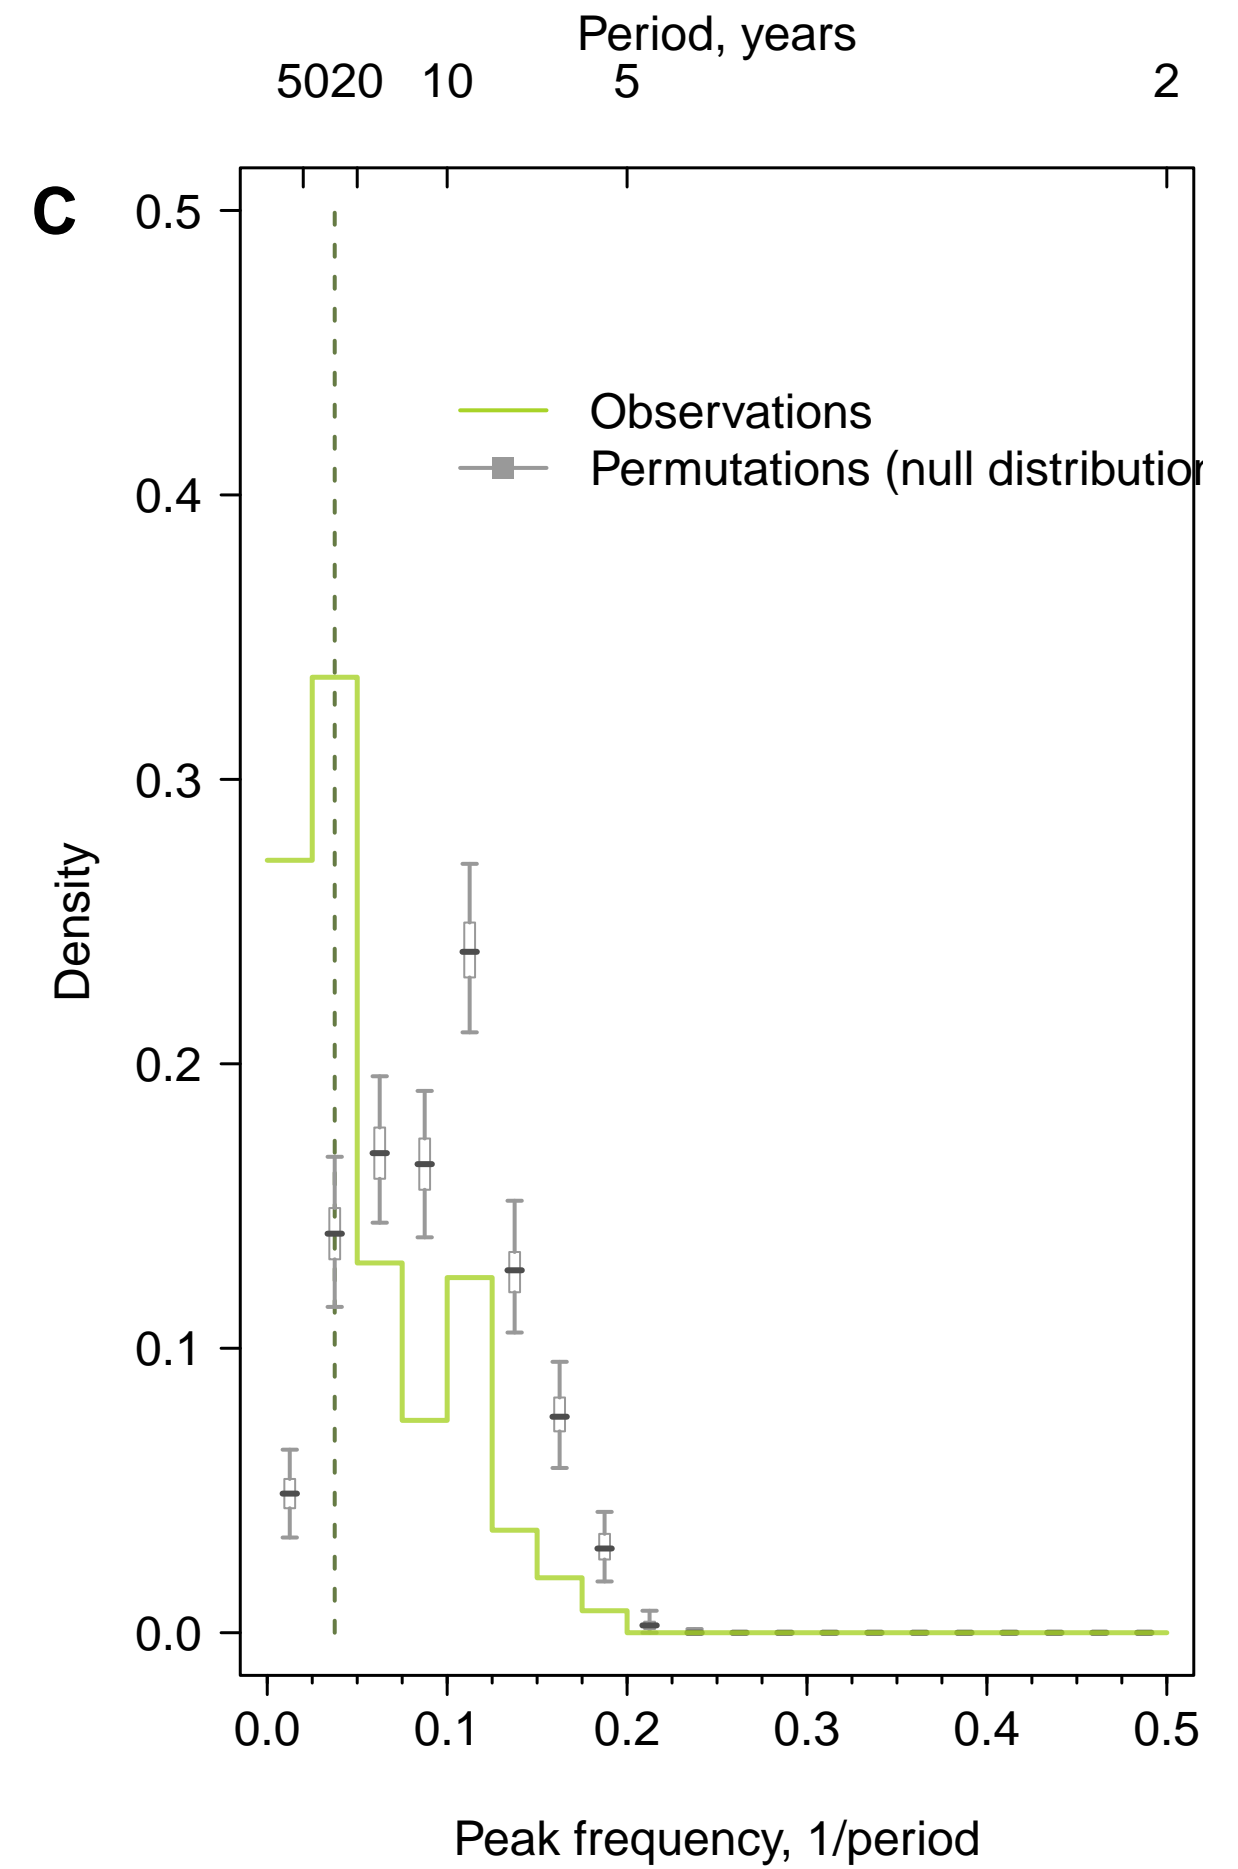

Supplement: supp [file elife-81457-supp-v1.zip]
